# Supplementary material for: Intramolecular pnicogen interactions in phosphorus and arsenic analogues of proton sponges
Source: Royal Society of Chemistry journal article supplement (doi:10.1039/c4cp01072h), 2014-01-01

# **Intramolecular pnictogen interactions in phosphorus and arsenic analogues of proton sponges.**

## ***Supporting Information***

Goar Sánchez-Sanz,<sup>†</sup> Cristina Trujillo,<sup>\*‡</sup> Ibon Alkorta,<sup>§</sup> and José Elguero<sup>§</sup>

<sup>†</sup> School of Physics & Complex and Adaptive Systems Laboratory, Belfield, Dublin 4, Ireland

<sup>‡</sup> Institute of Organic Chemistry and Biochemistry, Gilead Sciences Research Center & IOCB, Academy of Sciences of the Czech Republic, Flemingovo nám. 2, 166 10 Praha 6, Czech Republic

<sup>§</sup> Instituto de Química Médica (CSIC), Juan de la Cierva, 3; 28006-Madrid, Spain

-Table S1. Comparison between aug'-cc-pVDZ and aug'-cc-pVTZ basis sets. Structural parameters, distance in Å, Dihedral angle in °, at MP2 computational level.

-Table S2. Relative energies respect to the 1,8 derivative ( $E_{rel}$ ) and interaction energies ( $E_{iso}$ ) in  $\text{kJ}\cdot\text{mol}^{-1}$ , at different computation method, CCSDT(T) and MP2, and two different basis set.

-Table S3. Z-C-C angles (Ang) and Z-C-C-Z dihedral angles (both in °) of the systems studied at MP2/avtz//MP2/avdz computational level.

-Table S4. Electron density ( $\rho$ ), Laplacian ( $\nabla^2\rho$ ), electron potential density (V), kinetic energy density (G), C ratio and total electron density energy (H) at MP2/aug'-cc-pVDZ computational level.

-Table S5. AIM charges

-Table S6. 1,8-bis-phosphine derivatives found in the CSD database with some of their geometrical characteristics

- Figure S1. AIM molecular graph for all the compounds considered. Green and red dots indicate bond critical (BCP) and ring critical (RCP) points.

- Figure S2. NCI plot of the non-covalent interaction of 1,8-PHF FP $\cdots$ PF (*R,R*) and 1,8-AsHF Fas $\cdots$ AsF (*R,R*), left and right respectively. Blue areas are those with  $\lambda_2 > 0$  (strong attractive), while green ones correspond to  $\lambda_2 \approx 0$  (weak).  $\lambda_2$  is one of the three eigenvalues of the electron density Hessian with  $\lambda_1 \leq \lambda_2 \leq \lambda_3$ .

- Figure S3. P $\cdots$ P distance vs. P-C-C bond in the X-ray structures found in the CSD search.

Table S1. Comparison between aug'-cc-pVDZ and aug'-cc-pVTZ basis sets. Structural parameters, distance in Å, Dihedral angle in °, at MP2 computational level.

|                     | Distance |          | Dihedral |          |
|---------------------|----------|----------|----------|----------|
|                     | MP2/avdz | MP2/avtz | MP2/avdz | MP2/avtz |
| 1,8-PH <sub>2</sub> | 3.038    | 2.986    | 17.8     | 15.6     |
| 1,8-PHF FPPF        | 2.680    | 2.604    | 27.5     | 27.3     |
| 1,8-PHF FPPH        | 2.805    | 2.731    | 14.7     | 15.5     |
| 1,8-PF <sub>2</sub> | 2.970    | 2.914    | 27.7     | 26.7     |

Table S2. Relative energies respect to the 1,8 derivative ( $E_{rel}$ ) and interaction energies ( $E_{iso}$ ) in kJ·mol<sup>-1</sup>, at different computation method, CCSDT(T) and MP2, and two different basis set.

|                        | $E_{rel}$              |                       |                       |                    |
|------------------------|------------------------|-----------------------|-----------------------|--------------------|
|                        | CCSD(T)/avdz//MP2/avdz | MP2/avdz <sup>a</sup> | MP2/avtz <sup>a</sup> | MP2/avtz//MP2/avdz |
| 1,8-PH <sub>2</sub>    | 0.0                    | 0.0                   | 0.0                   | 0.0                |
| 1,5-PH <sub>2</sub> C2 | -22.9                  | -22.0                 | -20.3                 | -20.6              |
| 1,5-PH <sub>2</sub> Ci | -22.9                  | -22.0                 | -20.3                 | -20.6              |
|                        |                        |                       |                       |                    |
| 1,8-PHF FPPF           | 0.0                    | 0.0                   | 0.0                   | 0.0                |
| 1,8-PHF FPPH           | 8.5                    | 10.8                  | 11.1                  | 11.0               |
| 1,5-PHF C2             | 4.0                    | 8.6                   | 13.6                  | 12.7               |
| 1,5-PHF Ci             | 3.6                    | 8.3                   | 13.5                  | 12.7               |
|                        |                        |                       |                       |                    |
| 1,8-PF <sub>2</sub>    | 0.0                    | 0.0                   | 0.0                   | 0.0                |
| 1,5-PF <sub>2</sub>    | -10.8                  | -11.1                 | -9.35                 | -11.1              |
|                        | $E_{iso}$              |                       |                       |                    |
|                        | CCSD(T)/avdz//MP2/avdz | MP2-avdz <sup>a</sup> | MP2-avtz <sup>a</sup> | MP2-avtz//MP2-avdz |
| 1,8-PH <sub>2</sub>    | 23.1                   | 22.2                  | 21.3                  | 21.2               |
| 1,5-PH <sub>2</sub> C2 | 0.2                    | 0.2                   | 0.6                   | 0.6                |
| 1,5-PH <sub>2</sub> Ci | 0.2                    | 0.1                   | 0.6                   | 0.6                |
|                        |                        |                       |                       |                    |
| 1,8-PHF FPPF           | -4.4                   | -11.3                 | -13.5                 | -11.1              |
| 1,8-PHF FPPH           | 4.0                    | 1.5                   | -1.3                  | -0.1               |
| 1,5-PHF C2             | -0.4                   | 1.4                   | 2.0                   | 1.6                |
| 1,5-PHF Ci             | -0.8                   | 1.1                   | 1.9                   | 1.6                |
|                        |                        |                       |                       |                    |
| 1,8-PF <sub>2</sub>    | 14.0                   | 14.0                  | 13.0                  | 14.0               |
| 1,5-PF <sub>2</sub>    | 3.2                    | 2.9                   | 3.7                   | 2.9                |

<sup>a</sup> from optimized geometries at this level.

Table S3. Z-C-C angles (Ang) and Z-C-C-Z dihedral angles (both in °) of the systems studied at MP2/avtz//MP2/avdz computational level.

| System and alignment |             | Sym                   | Ang <sup>a</sup>                  | Dihedral Ang <sup>b</sup> |                      |             | Sym                   | Ang <sup>a</sup>                 | Dihedral Ang <sup>b</sup> |
|----------------------|-------------|-----------------------|-----------------------------------|---------------------------|----------------------|-------------|-----------------------|----------------------------------|---------------------------|
| 1,8-PHF              |             |                       |                                   |                           | 1,8-AsHF             |             |                       |                                  |                           |
| FPPF                 | <i>R, R</i> | <i>C</i> <sub>2</sub> | 118.7                             | 27.5                      | FAsAsF               | <i>R, R</i> | <i>C</i> <sub>2</sub> | 120.7                            | 27.3                      |
| FPPH                 | <i>R, S</i> | <i>C</i> <sub>1</sub> | 123.9<br>(118.7)<br><sup>c</sup>  | 14.7                      | FAsAsH               | <i>R, S</i> | <i>C</i> <sub>1</sub> | 125.6<br>(120.3)<br><sup>c</sup> | 12.0                      |
| HPPH                 | <i>R, R</i> | <i>C</i> <sub>2</sub> | 123.5                             | 10.9                      | HAsAsH               | <i>R, R</i> | <i>C</i> <sub>2</sub> | 124.5                            | 10.0                      |
| 1,5-PHF              | <i>R, R</i> | <i>C</i> <sub>2</sub> |                                   |                           | 1,5-AsHF             | <i>R, R</i> | <i>C</i> <sub>2</sub> |                                  |                           |
|                      | <i>R, S</i> | <i>C</i> <sub>i</sub> |                                   |                           |                      | <i>R, S</i> | <i>C</i> <sub>i</sub> |                                  |                           |
| 1,8-PHCl             |             |                       |                                   |                           | 1,8-AsHCl            |             |                       |                                  |                           |
| CIPPCI               | <i>R, R</i> | <i>C</i> <sub>2</sub> | 117.2                             | 30.3                      | ClAsAsCl             | <i>R, R</i> | <i>C</i> <sub>2</sub> | 118.8                            | 31.2                      |
| CIPPH                | <i>R, S</i> | <i>C</i> <sub>1</sub> | 120.51<br>(120.0)<br><sup>c</sup> | 22.5                      | ClAsAsH              | <i>R, S</i> | <i>C</i> <sub>1</sub> | 122.0<br>(121.0)<br><sup>c</sup> | 22.2                      |
| HPPH                 | <i>R, R</i> | <i>C</i> <sub>2</sub> | 123.8                             | 1.9                       | HAsAsH               | <i>R, R</i> | <i>C</i> <sub>2</sub> | 124.7                            | 5.0                       |
| 1,5-PHCl             | <i>R, R</i> | <i>C</i> <sub>2</sub> |                                   |                           | 1,5-AsHCl            | <i>R, R</i> | <i>C</i> <sub>2</sub> |                                  |                           |
|                      | <i>R, S</i> | <i>C</i> <sub>i</sub> |                                   |                           |                      | <i>R, S</i> | <i>C</i> <sub>i</sub> |                                  |                           |
| 1,8-PHBr             |             |                       |                                   |                           | 1,8-AsHBr            |             |                       |                                  |                           |
| BrPPBr               | <i>R, R</i> | <i>C</i> <sub>2</sub> | 116.5                             | 30.8                      | BrAsAsBr             | <i>R, R</i> | <i>C</i> <sub>2</sub> | 118.3                            | 32.1                      |
| BrPPH                | <i>R, S</i> | <i>C</i> <sub>1</sub> | 119.8<br>(120.0)<br><sup>c</sup>  | 24.7                      | BrAsAsH              | <i>R, S</i> | <i>C</i> <sub>1</sub> | 121.2<br>(121.0)<br><sup>c</sup> | 24.9                      |
| HPPH                 | <i>R, R</i> | <i>C</i> <sub>2</sub> | 123.6                             | 6.3                       | HAsAsH               | <i>R, R</i> | <i>C</i> <sub>2</sub> | 124.5                            | 9.2                       |
| 1,5-PHBr             | <i>R, R</i> | <i>C</i> <sub>2</sub> |                                   |                           | 1,5-AsHBr            | <i>R, R</i> | <i>C</i> <sub>2</sub> |                                  |                           |
|                      | <i>R, S</i> | <i>C</i> <sub>i</sub> |                                   |                           |                      | <i>R, S</i> | <i>C</i> <sub>i</sub> |                                  |                           |
|                      |             |                       |                                   |                           |                      |             |                       |                                  |                           |
| 1,8-PH <sub>2</sub>  | -           | <i>C</i> <sub>2</sub> | 123.5                             | 17.8                      | 1,8-AsH <sub>2</sub> | -           | <i>C</i> <sub>2</sub> | 124.0                            | 20.6                      |

|                      |   |                |       |      |                       |   |                |       |      |
|----------------------|---|----------------|-------|------|-----------------------|---|----------------|-------|------|
| 1,5-PH <sub>2</sub>  | - | C <sub>2</sub> |       |      | 1,5-AsH <sub>2</sub>  | - | C <sub>2</sub> |       |      |
|                      | - | C <sub>i</sub> |       |      |                       | - | C <sub>i</sub> |       |      |
| 1,8-PF <sub>2</sub>  | - | C <sub>1</sub> | 121.4 | 27.7 | 1,8-AsF <sub>2</sub>  | - | C <sub>1</sub> | 122.9 | 27.1 |
| 1,5-PF <sub>2</sub>  | - | C <sub>2</sub> |       |      | 1,5-AsF <sub>2</sub>  | - | C <sub>2</sub> |       |      |
|                      | - | C <sub>i</sub> |       |      |                       | - | C <sub>2</sub> |       |      |
| 1,8-PCl <sub>2</sub> | - | C <sub>2</sub> | 118.3 | 32.6 | 1,8-AsCl <sub>2</sub> | - | C <sub>2</sub> | 119.7 | 33.6 |
| 1,5-PCl <sub>2</sub> | - | C <sub>2</sub> |       |      | 1,5-AsCl <sub>2</sub> | - | C <sub>2</sub> |       |      |
|                      | - | C <sub>i</sub> |       |      |                       | - | C <sub>i</sub> |       |      |
| 1,8-PBr <sub>2</sub> | - | C <sub>2</sub> | 117.2 | 33.1 | 1,8-AsBr <sub>2</sub> | - | C <sub>2</sub> | 118.8 | 34.3 |
| 1,5-PBr <sub>2</sub> | - | C <sub>2</sub> |       |      | 1,5-AsBr <sub>2</sub> | - | C <sub>2</sub> |       |      |
|                      | - | C <sub>i</sub> |       |      |                       | - | C <sub>i</sub> |       |      |

<sup>a</sup> Angle correspond to that formed by Z-C1-C2 atoms, in which C2 is the atom shared by the two rings.

<sup>b</sup> Dihedral angle correspond to that formed by C-Z···Z-C atoms.

<sup>c</sup> Number in parenthesis correspond to the angle in the group with Z-H alignment.

Table S4. Electron density ( $\rho$ ), Laplacian ( $\nabla^2\rho$ ), electron potential density (V), kinetic energy density (G), C ratio and total electron density energy (H) at MP2/aug'-cc-pVDZ computational level.

|                     | Stoich. | $\rho$ | $\nabla^2\rho$ | V       | G      | C      | H       |
|---------------------|---------|--------|----------------|---------|--------|--------|---------|
| 1,8-PH <sub>2</sub> |         | 0.0194 | 0.0409         | -0.0103 | 0.0103 | 1.0041 | 0.0000  |
| 1,8-PHF             |         |        |                |         |        |        |         |
| FPPF                | R,R     | 0.0425 | 0.0340         | -0.0264 | 0.0174 | 1.5121 | -0.0089 |
| FPPH                | R,S     | 0.0326 | 0.0440         | -0.0190 | 0.0150 | 1.2659 | -0.0040 |
| HPPH                | R,R     | 0.0232 | 0.0429         | -0.0120 | 0.0114 | 1.0555 | -0.0006 |
| 1,8-PHCl            |         |        |                |         |        |        |         |
| CIPPCl              | R,R     | 0.0442 | 0.0332         | -0.0273 | 0.0178 | 1.5342 | -0.0095 |
| CIPPH               | R,S     | 0.0307 | 0.0444         | -0.0175 | 0.0143 | 1.2231 | -0.0032 |
| HPPH                | R,R     | 0.0236 | 0.0448         | -0.0128 | 0.0120 | 1.0658 | -0.0008 |
| 1,8-PHBr            |         |        |                |         |        |        |         |
| BrPPBr              | R,R     | 0.0487 | 0.0276         | -0.0308 | 0.0188 | 1.6340 | -0.0119 |
| BrPPH               | R,S     | 0.0311 | 0.0447         | -0.0178 | 0.0145 | 1.2272 | -0.0033 |
| HPPH                | R,R     | 0.0237 | 0.0456         | -0.0130 | 0.0122 | 1.0673 | -0.0008 |



|                      |       |        |        |                  |       |        |        |       |
|----------------------|-------|--------|--------|------------------|-------|--------|--------|-------|
| CIPPCl               | 1.675 | -0.559 | -0.582 | 0.534            |       |        |        |       |
| CIPPH                | 1.667 | -0.566 | -0.586 | 0.515            | 1.713 | -0.569 | -0.578 | 0.566 |
| HPPH                 | 1.700 | -0.567 | -0.584 | 0.549            |       |        |        |       |
| 1,5-PHCl             | 1.708 | -0.561 | -0.587 | 0.560            |       |        |        |       |
|                      | 1.707 | -0.562 | -0.587 | 0.559            |       |        |        |       |
| 1-PHCl               | 1.704 | -0.563 | -0.588 | 0.553            |       |        |        |       |
|                      |       |        |        |                  |       |        |        |       |
| 1,8-PHBr             |       |        |        |                  |       |        |        |       |
| BrPPBr               | 1.511 | -0.400 | -0.580 | 0.531            |       |        |        |       |
| BrPPH                | 1.503 | -0.403 | -0.583 | 0.516            | 1.526 | -0.388 | -0.577 | 0.561 |
| HPPH                 | 1.527 | -0.395 | -0.582 | 0.550            |       |        |        |       |
| 1,5-PHBr             | 1.536 | -0.390 | -0.585 | 0.561            |       |        |        |       |
|                      | 1.538 | -0.392 | -0.585 | 0.561            |       |        |        |       |
| 1-PHBr               | 1.535 | -0.395 | -0.587 | 0.554            |       |        |        |       |
|                      |       | align  | perp   |                  |       |        |        |       |
|                      | P1-X1 | X1     | X2     | P1X <sub>2</sub> |       |        |        |       |
| 1,8-PH <sub>2</sub>  | 1.725 | -0.586 | -0.579 | 0.559            |       |        |        |       |
| 1,5-PH <sub>2</sub>  | 1.736 | -0.582 | -0.577 | 0.000            |       |        |        |       |
|                      | 1.735 | -0.581 | -0.577 | 0.577            |       |        |        |       |
| 1-PH <sub>2</sub>    | 1.736 | -0.581 | -0.578 | 0.577            |       |        |        |       |
|                      |       |        |        |                  |       |        |        |       |
| 1,8-PF <sub>2</sub>  | 2.176 | -0.810 | -0.811 | 0.555            |       |        |        |       |
| 1,5-PF <sub>2</sub>  | 2.186 | -0.808 | -0.811 | 0.567            |       |        |        |       |
|                      | 2.184 | -0.809 | -0.811 | 0.565            |       |        |        |       |
| 1-PF <sub>2</sub>    | 2.183 | -0.809 | -0.812 | 0.562            |       |        |        |       |
|                      |       |        |        |                  |       |        |        |       |
| 1,8-PCl <sub>2</sub> | 1.613 | -0.538 | -0.546 | 0.529            |       |        |        |       |
| 1,5-PCl <sub>2</sub> | 1.632 | -0.553 | -0.538 | 0.542            |       |        |        |       |
|                      | 1.632 | -0.552 | -0.538 | 0.541            |       |        |        |       |
| 1-PCl <sub>2</sub>   | 1.630 | -0.554 | -0.541 | 0.535            |       |        |        |       |
|                      |       |        |        |                  |       |        |        |       |
| 1,8-PBr <sub>2</sub> | 1.222 | -0.351 | -0.346 | 0.526            |       |        |        |       |
| 1,5-PBr <sub>2</sub> | 1.243 | -0.352 | -0.349 | 0.542            |       |        |        |       |
|                      | 1.244 | -0.352 | -0.351 | 0.542            |       |        |        |       |
| 1-PBr <sub>2</sub>   | 1.246 | -0.357 | -0.355 | 0.534            |       |        |        |       |
|                      |       |        |        |                  |       |        |        |       |
|                      | As1-X | X      | H      | As1XH            | As2-H | X      | H      | As2XH |
| 1,8-AsHF             |       |        |        |                  |       |        |        |       |
| FAsAsF               | 1.358 | -0.726 | -0.316 | 0.315            |       |        |        |       |
| FAsAsH               | 1.360 | -0.733 | -0.327 | 0.300            | 1.380 | -0.718 | -0.313 | 0.348 |

|                       |        |        |        |                   |       |        |        |       |
|-----------------------|--------|--------|--------|-------------------|-------|--------|--------|-------|
| HAsAsH                | 1.397  | -0.727 | -0.333 | 0.336             |       |        |        |       |
| 1,5-AsHF              | 1.393  | -0.722 | -0.334 | 0.337             |       |        |        |       |
|                       | 1.392  | -0.723 | -0.334 | 0.335             |       |        |        |       |
| 1-AsHF                | 1.390  | -0.723 | -0.337 | 0.330             |       |        |        |       |
|                       |        |        |        |                   |       |        |        |       |
| 1,8-AsHCl             |        |        |        |                   |       |        |        |       |
| ClAsAsCl              | 1.123  | -0.521 | -0.300 | 0.302             |       |        |        |       |
| ClAsAsH               | 1.140  | -0.527 | -0.310 | 0.303             | 1.135 | -0.510 | -0.302 | 0.322 |
| HAsAsH                | 1.158  | -0.523 | -0.315 | 0.319             |       |        |        |       |
| 1,5-AsHCl             | 1.155  | -0.516 | -0.317 | 0.322             |       |        |        |       |
|                       | 1.157  | -0.518 | -0.317 | 0.322             |       |        |        |       |
| 1-AsHCl               | 1.154  | -0.520 | -0.319 | 0.315             |       |        |        |       |
|                       |        |        |        |                   |       |        |        |       |
| 1,8-AsHBr             |        |        |        |                   |       |        |        |       |
| BrAsAsBr              | 1.019  | -0.422 | -0.297 | 0.301             |       |        |        |       |
| BrAsAsH               | 1.039  | -0.426 | -0.307 | 0.306             | 1.024 | -0.404 | -0.301 | 0.319 |
| HAsAsH                | 1.156  | -0.523 | -0.315 | 0.317             |       |        |        |       |
| 1,5-AsHBr             | 1.052  | -0.413 | -0.314 | 0.325             |       |        |        |       |
|                       | 1.053  | -0.415 | -0.314 | 0.323             |       |        |        |       |
| 1-AsHBr               | 1.049  | -0.418 | -0.316 | 0.315             |       |        |        |       |
|                       |        |        |        |                   |       |        |        |       |
|                       | As1-X1 | X1     | X2     | As1X <sub>2</sub> |       |        |        |       |
| 1,8-AsH <sub>2</sub>  | 1.002  | -0.334 | -0.320 | 0.348             |       |        |        |       |
| 1,5-AsH <sub>2</sub>  | 1.008  | -0.326 | -0.322 | 0.360             |       |        |        |       |
|                       | 1.008  | -0.326 | -0.322 | 0.359             |       |        |        |       |
| 1-AsH <sub>2</sub>    | 1.002  | -0.326 | -0.326 | 0.350             |       |        |        |       |
|                       |        |        |        |                   |       |        |        |       |
| 1,8-AsF <sub>2</sub>  | 1.733  | -0.712 | -0.712 | 0.309             |       |        |        |       |
| 1,5-AsF <sub>2</sub>  | 1.748  | -0.714 | -0.713 | 0.322             |       |        |        |       |
|                       | 1.750  | -0.714 | -0.713 | 0.322             |       |        |        |       |
| 1-AsF <sub>2</sub>    | 1.743  | -0.716 | -0.715 | 0.313             |       |        |        |       |
|                       |        |        |        |                   |       |        |        |       |
| 1,8-AsCl <sub>2</sub> | 1.259  | -0.488 | -0.486 | 0.285             |       |        |        |       |
| 1,5-AsCl <sub>2</sub> | 1.278  | -0.491 | -0.487 | 0.300             |       |        |        |       |
|                       | 1.278  | -0.492 | -0.487 | 0.299             |       |        |        |       |
| 1-AsCl <sub>2</sub>   | 1.275  | -0.496 | -0.492 | 0.287             |       |        |        |       |
|                       |        |        |        |                   |       |        |        |       |
| 1,8-AsBr <sub>2</sub> | 1.034  | -0.377 | -0.373 | 0.284             |       |        |        |       |
| 1,5-AsBr <sub>2</sub> | 1.056  | -0.373 | -0.380 | 0.302             |       |        |        |       |
|                       | 1.057  | -0.373 | -0.383 | 0.301             |       |        |        |       |
| 1-AsBr <sub>2</sub>   | 1.053  | -0.379 | -0.387 | 0.288             |       |        |        |       |



Table S6. 1,8-bis-phosphine derivatives found in the CSD database with some of their geometrical characteristics

| Refcode  | P···P dist (Å) | av. P-C-C(°) | C-P···P-C (°) |
|----------|----------------|--------------|---------------|
| GUTJIO   | 2.767          | 116.8        | 33.9          |
| GUTJEK   | 2.798          | 118.5        | 23.5          |
| GUTJEK   | 2.811          | 119.4        | 20.5          |
| MIRJIG   | 2.909          | 121.9        | 10.4          |
| ULIJAA   | 2.912          | 121.8        | 11.4          |
| JUHJOL   | 2.927          | 122.2        | 12.0          |
| JUHKOM   | 2.935          | 122.3        | 4.5           |
| JUHJOL   | 2.944          | 122.2        | 10.9          |
| FAKQAK   | 2.985          | 123.8        | 1.3           |
| RESNUY   | 3.036          | 123.1        | 16.9          |
| LAYTOU01 | 3.048          | 123.1        | 14.8          |
| LAYTOU   | 3.052          | 123.7        | 14.9          |
| JUHKUS   | 3.056          | 118.2        | 39.1          |
| RESNUY   | 3.070          | 121.6        | 25.8          |
| RIXYIG   | 3.117          | 122.9        | 20.6          |
| MOGDUH   | 3.119          | 123.2        | 21.3          |
| RIXYIG   | 3.124          | 123.2        | 22.5          |
| NIKGOE   | 3.125          | 118.8        | 37.6          |
| NIKGOE   | 3.188          | 119.8        | 37.0          |
| NIKGOE   | 3.235          | 119.3        | 38.6          |
| NIKGOE   | 3.272          | 118.9        | 42.0          |

Figure S1. AIM molecular graph for all the compounds considered. Green and red dots indicate bond critical (BCP) and ring critical (RCP) points.

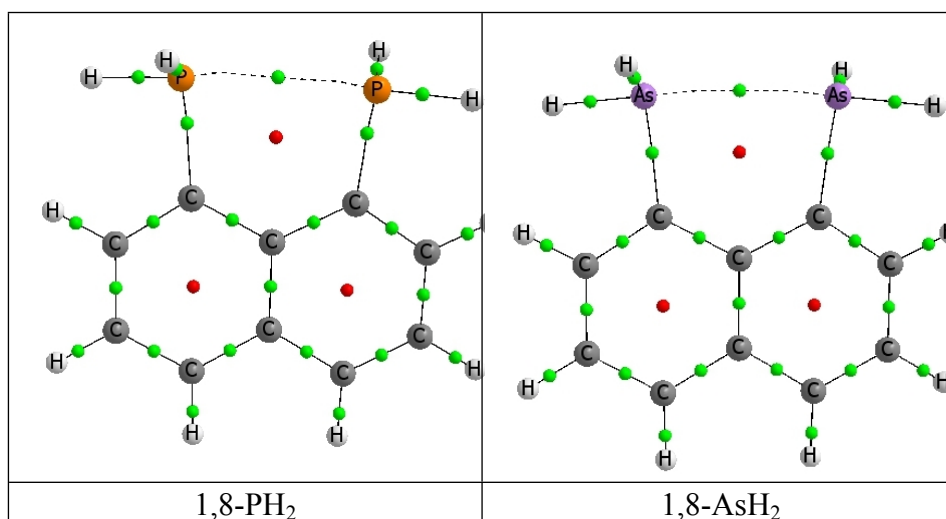

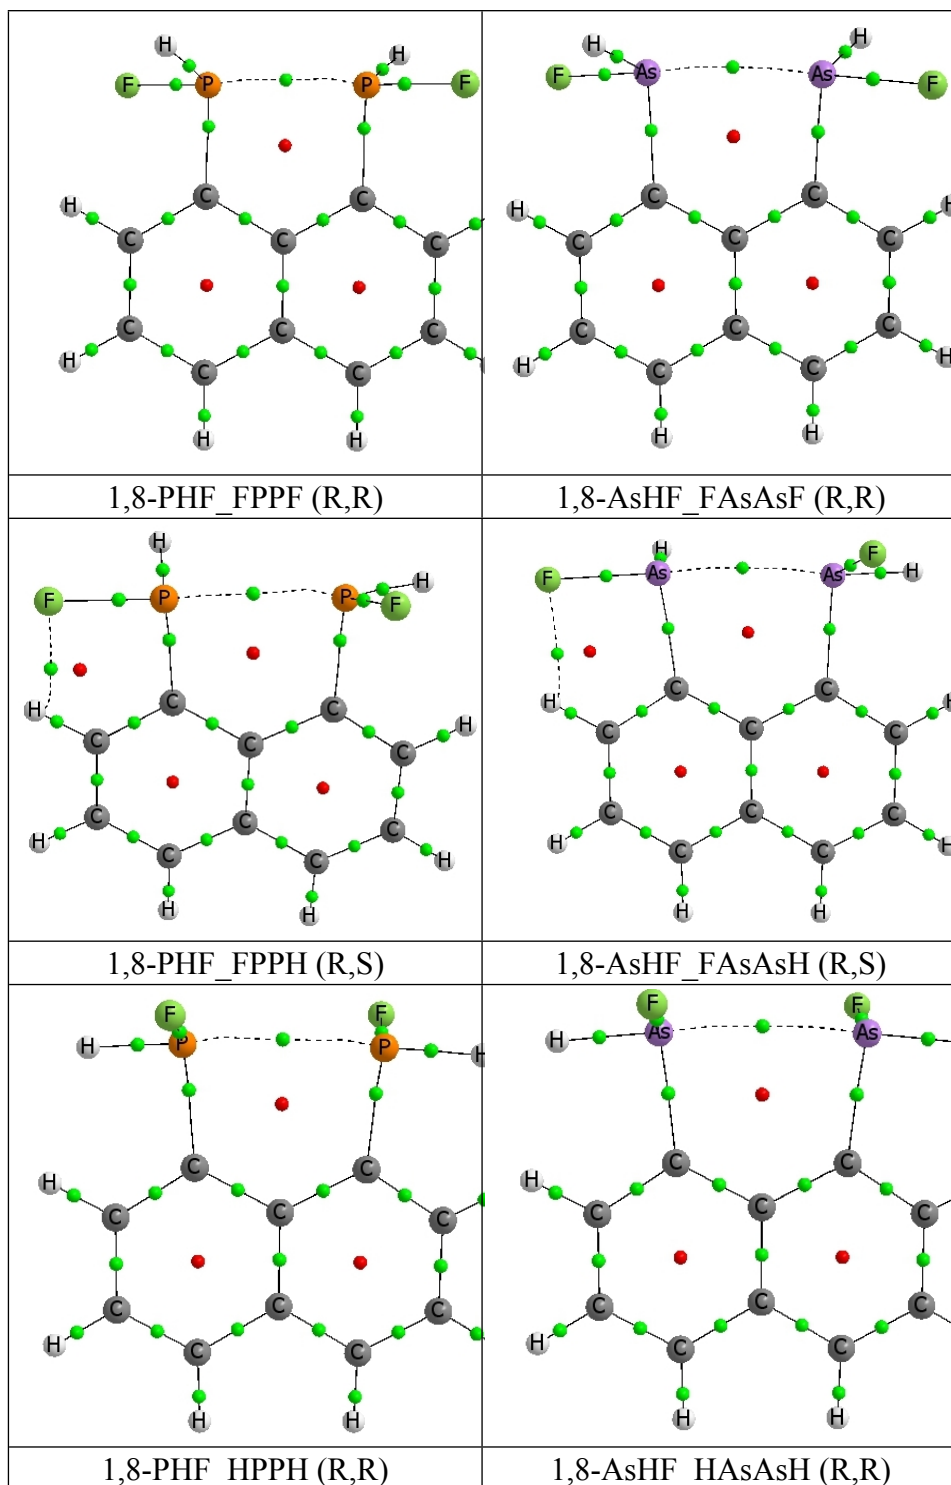

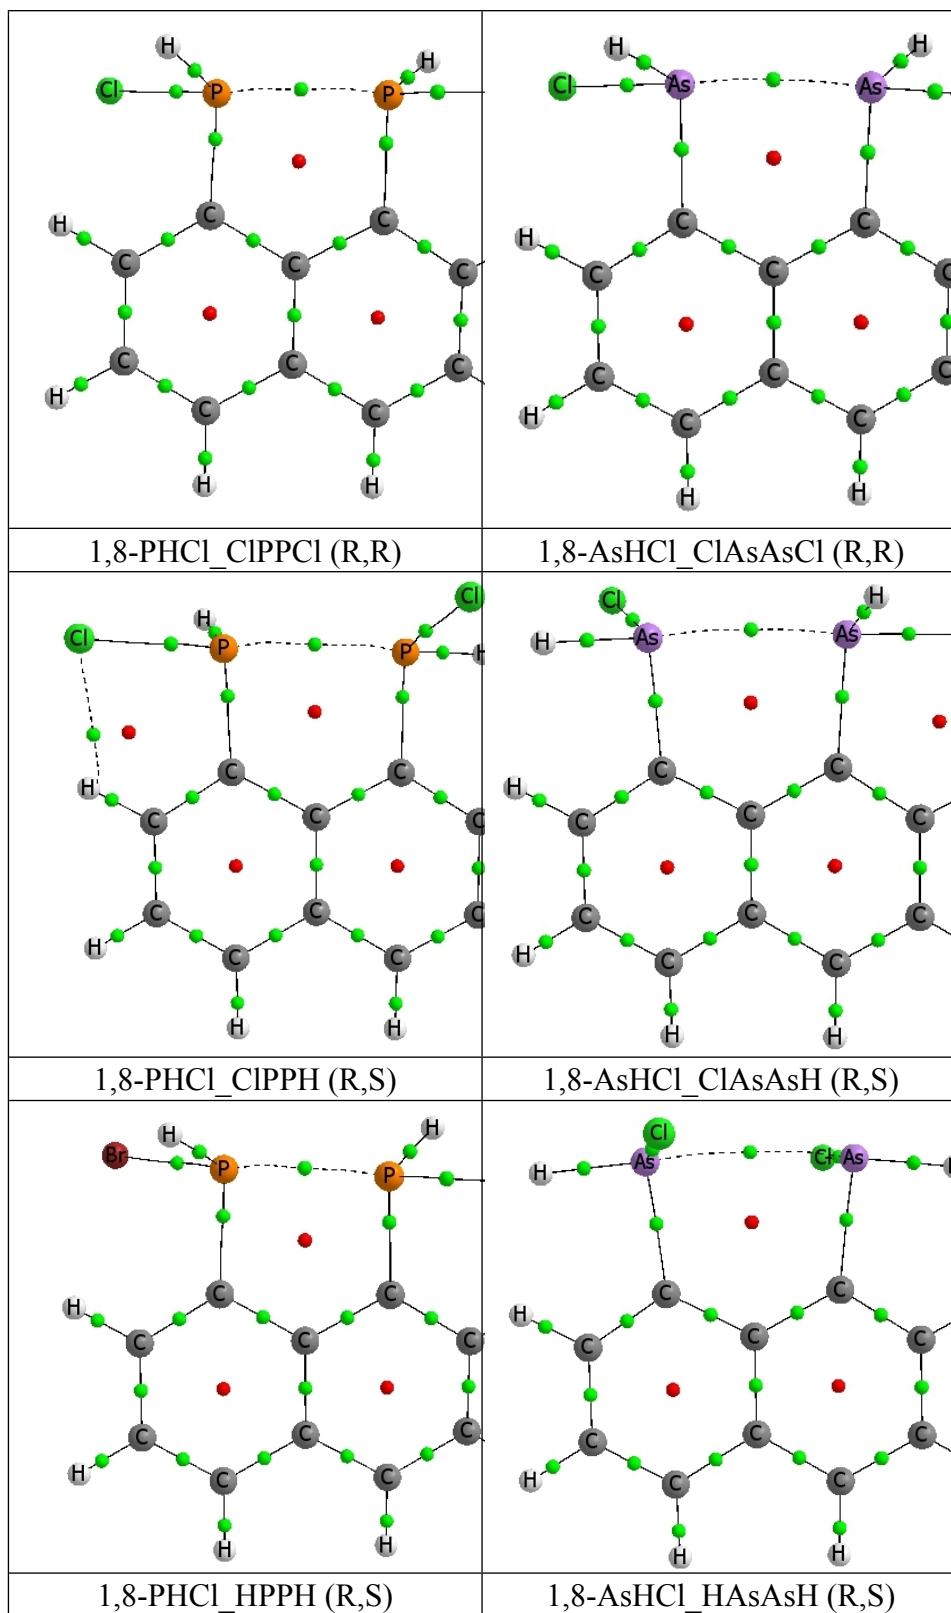

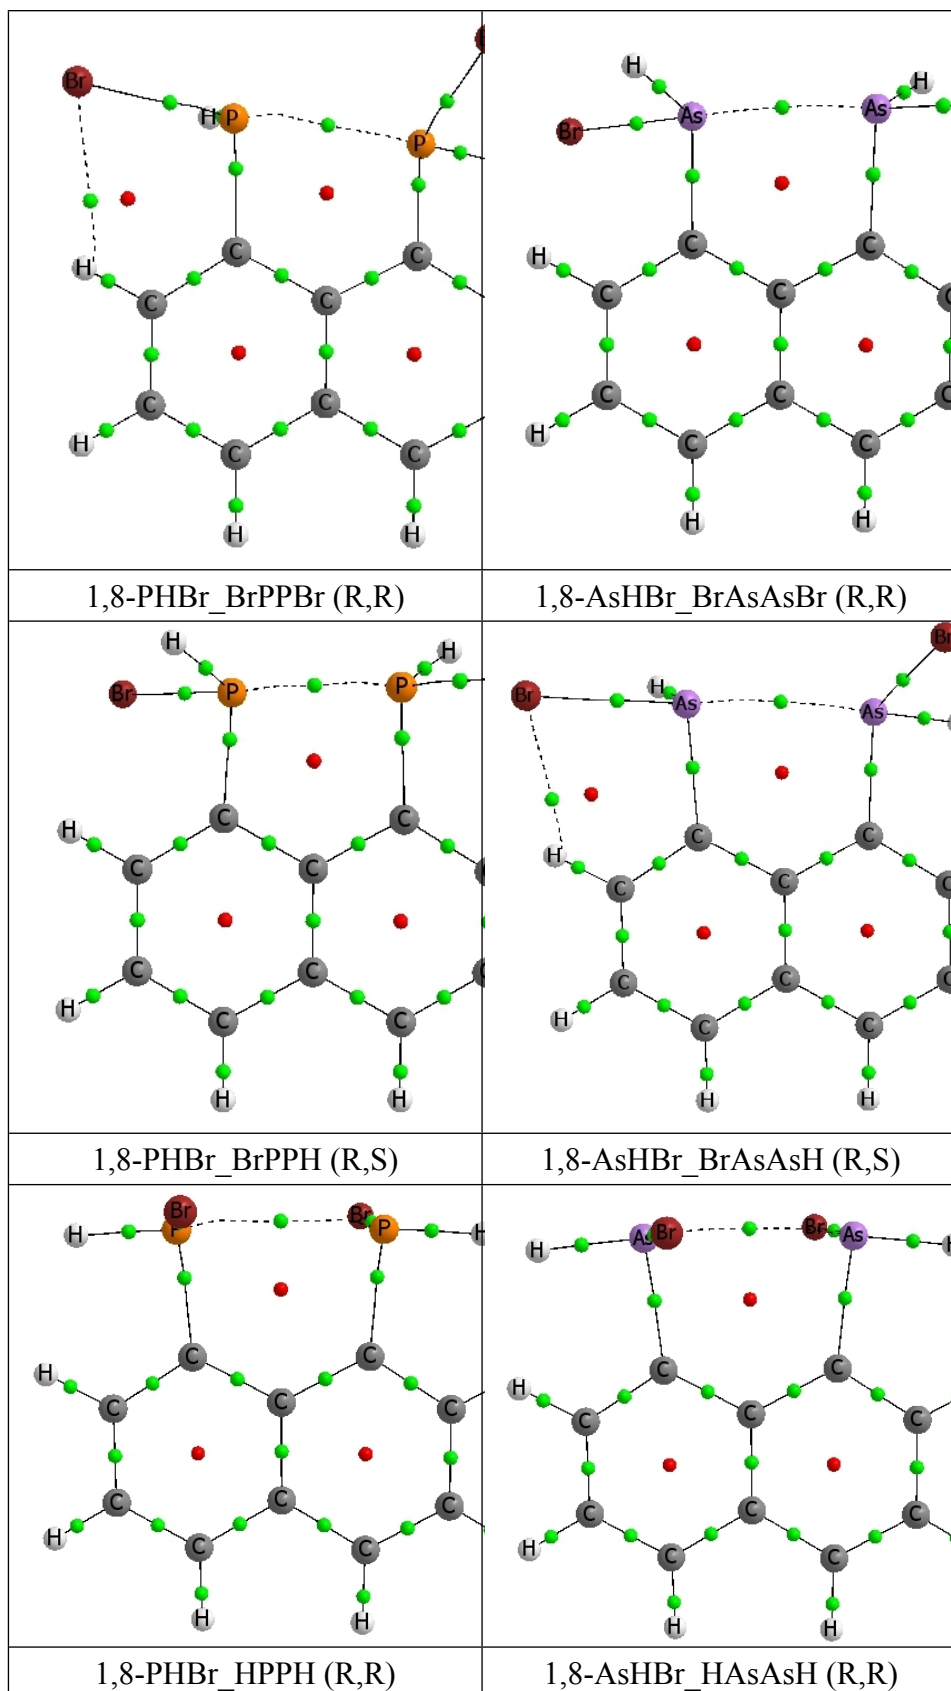

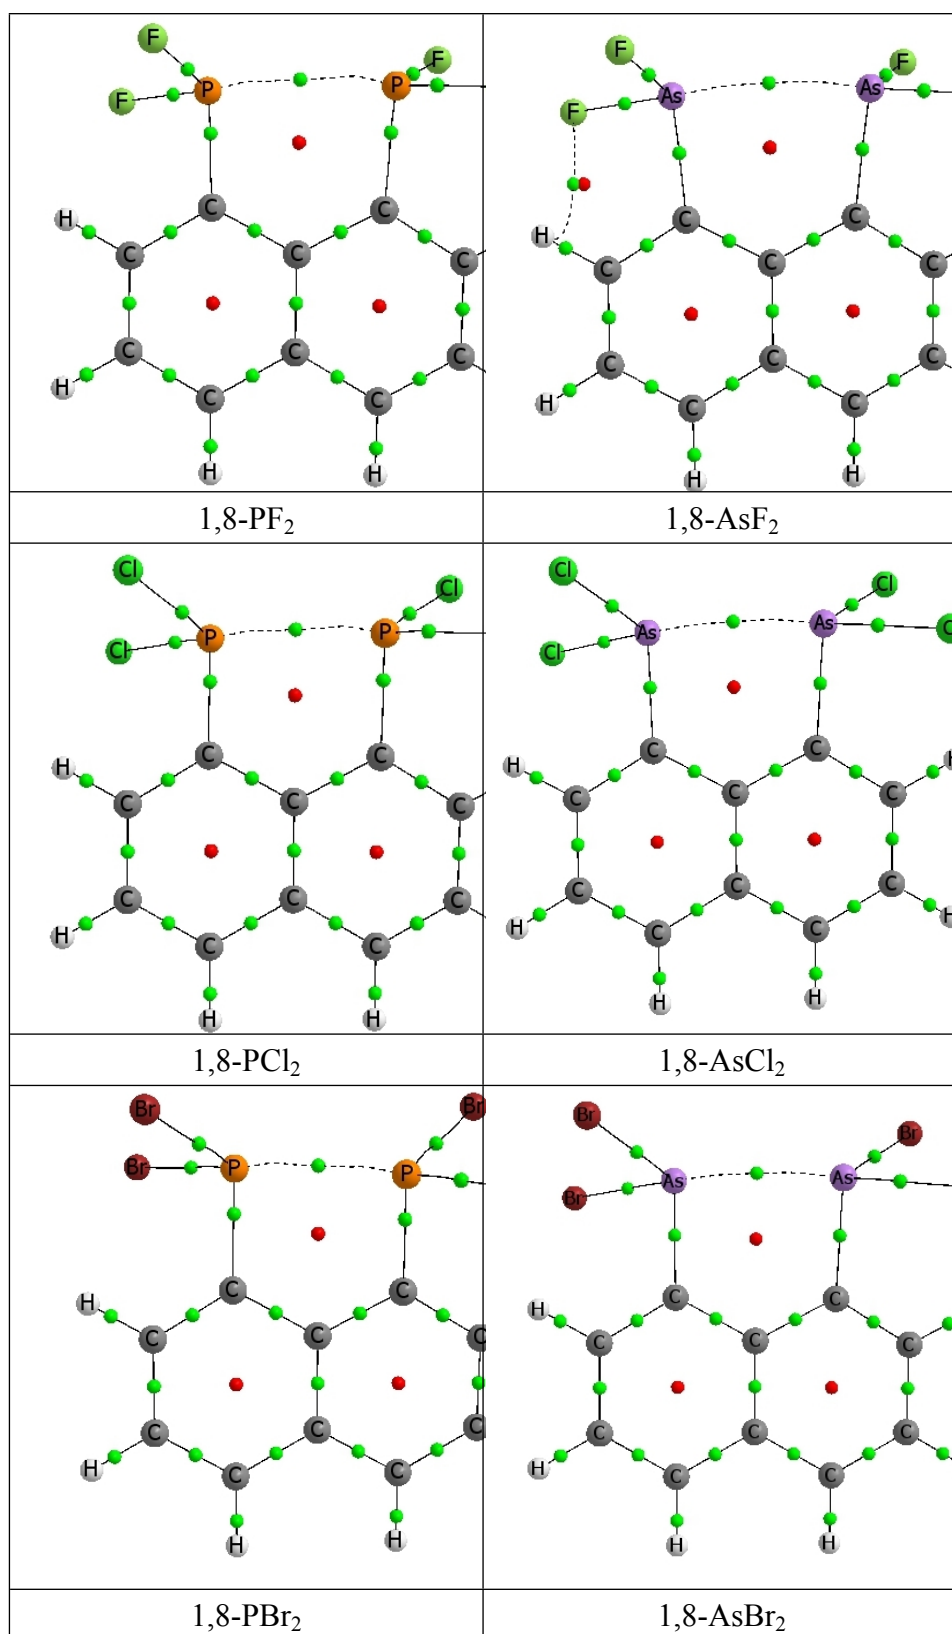

Figure S2. NCI plot of the non-covalent interaction of 1,8-PHF FPPF (*R,R*) and 1,8-AsHF FAsAsF (*R,R*), left and right respectively. Blue areas are those with  $\lambda_2 > 0$  (strong

attractive), while green ones correspond to  $\lambda_2 \approx 0$  (weak).  $\lambda_2$  is one of the three eigenvalues of the electron density Hessian with  $\lambda_1 \leq \lambda_2 \leq \lambda_3$ .

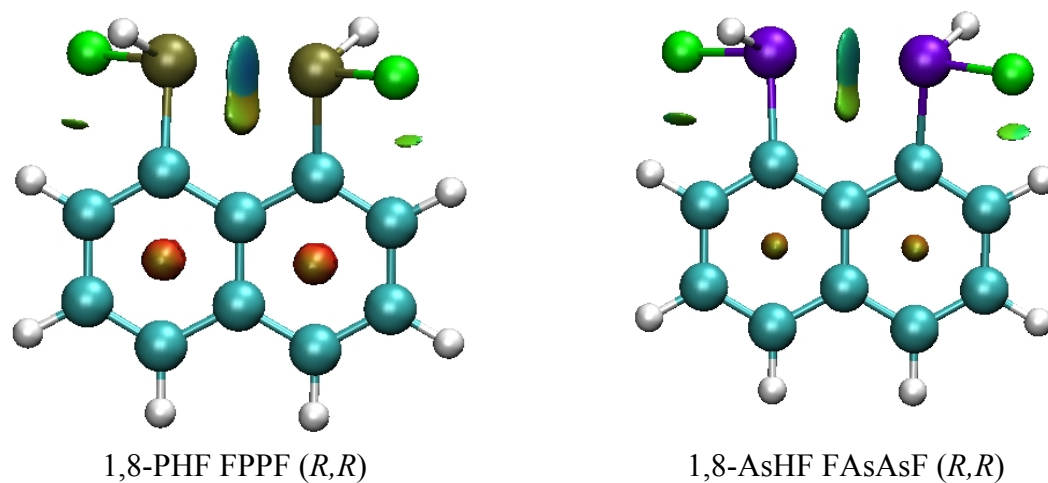

Figure S3. P...P distance vs. P-C-C bond in the X-ray structures found in the CSD search.

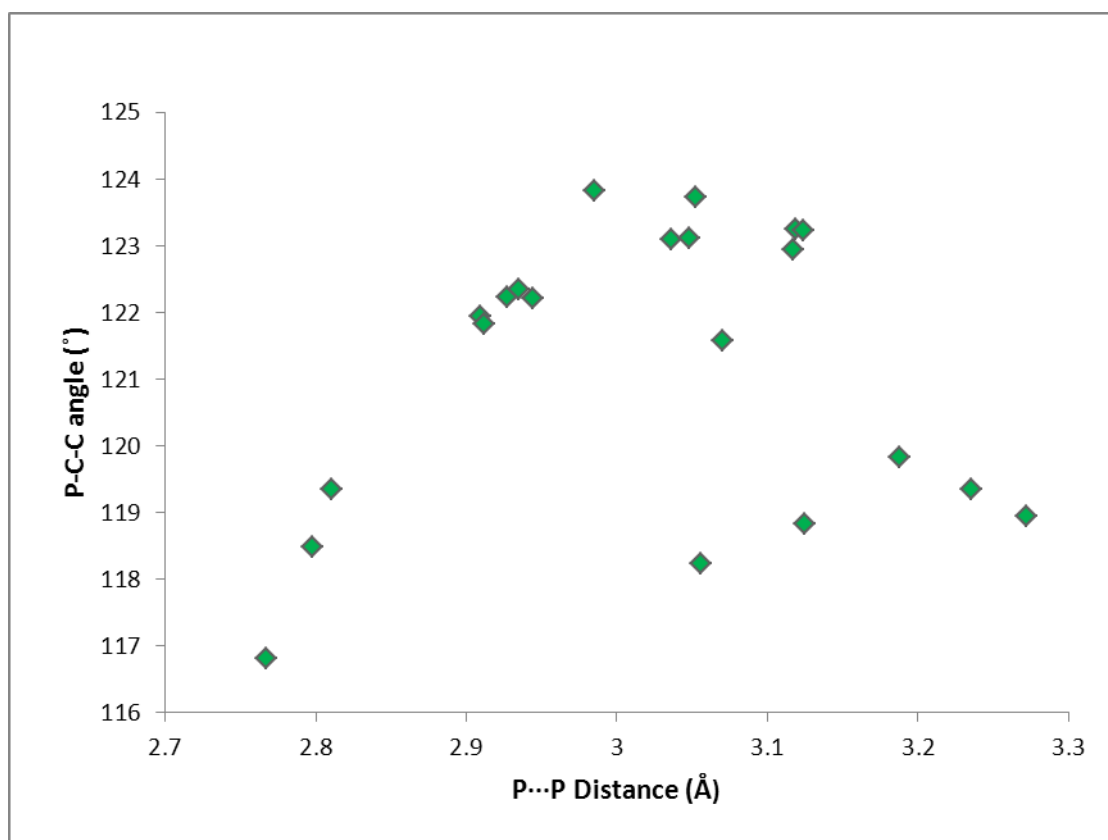

Supplement: c4cp01072h1.pdf [file c4cp01072h1.pdf]
